# Supplementary material for: Treatment and Valorization of Agro-Industrial Anaerobic Digestate Using Activated Carbon Followed by Spirulina platensis Cultivation
Source: MDPI journal article supplement (doi:10.3390/su15054571), 2023-03-03
Supplement: s1 [file s1]

## Supplementary Materials

**Table S1.** Initial and final pH measured during digestate pre-treatment using various doses of activated carbon (AC). For the variation of pH, different letters indicate statistical differences among different AC concentrations ( $p < 0.05$ ).

| AC concentration (g/L) | pH          | pH variation (%)          |
|------------------------|-------------|---------------------------|
| 0                      | 8.50 ± 0.03 | -                         |
| 5                      | 8.57 ± 0.02 | - 0.8 ± 0.2 <sup>a</sup>  |
| 10                     | 8.58 ± 0.00 | - 0.9 ± 0.0 <sup>a</sup>  |
| 25                     | 8.60 ± 0.00 | - 1.3 ± 0.0 <sup>ab</sup> |
| 50                     | 8.63 ± 0.03 | - 1.6 ± 0.3 <sup>bc</sup> |
| 100                    | 8.67 ± 0.00 | - 2.0 ± 0.0 <sup>c</sup>  |

**Table S2.** Ammonium concentration variations observed during digestate pre-treatment using various doses of activated carbon (AC). The same letter indicate no statistical differences were observed among the different AC doses ( $p < 0.05$ ).

| AC concentration (g/L) | NH <sub>4</sub> -N (mg/L) | NH <sub>4</sub> -N removal (%) |
|------------------------|---------------------------|--------------------------------|
| 0                      | 4405 ± 79                 | -                              |
| 5                      | 4357 ± 265                | 1.1 ± 6.0 <sup>a</sup>         |
| 10                     | 4269 ± 164                | 3.1 ± 3.7 <sup>a</sup>         |
| 25                     | 4337 ± 192                | 1.6 ± 4.4 <sup>a</sup>         |
| 50                     | 4220 ± 141                | 4.2 ± 3.2 <sup>a</sup>         |
| 100                    | 4255 ± 203                | 3.4 ± 4.6 <sup>a</sup>         |
